# Supplementary material for: Dynein activating adaptor BICD2 controls radial migration of upper-layer cortical neurons in vivo
Source: Springer Nature journal article supplement (doi:10.1186/s40478-019-0827-y), 2019-10-26
Supplement: MOESM1 [file 25666974]

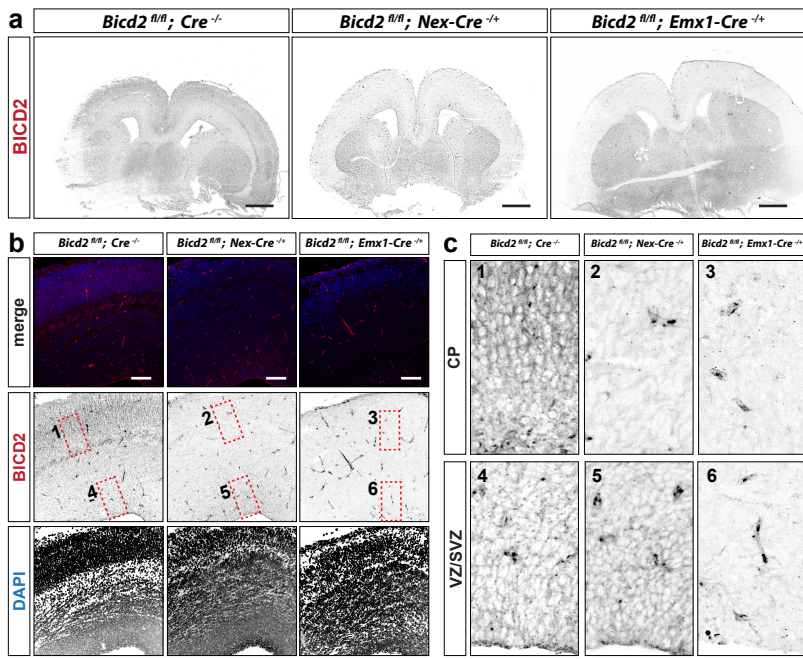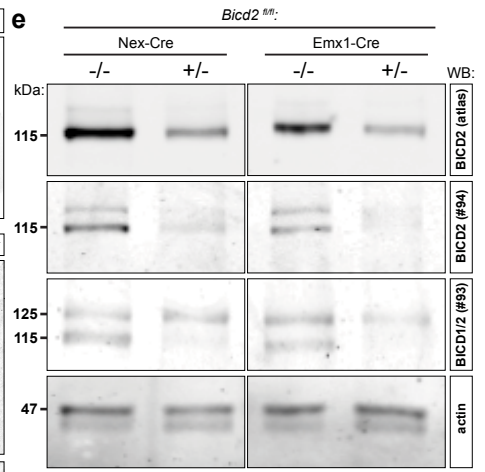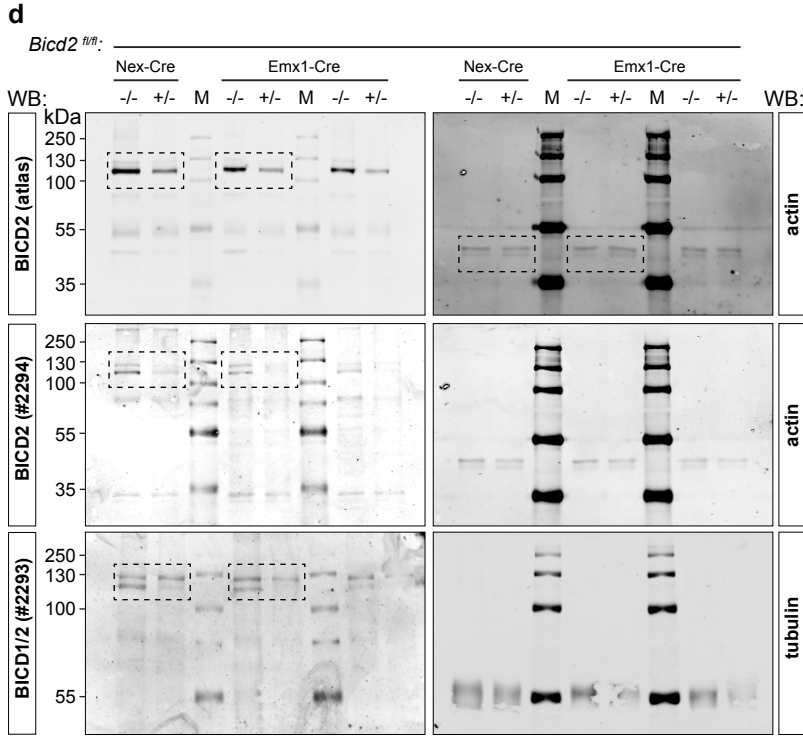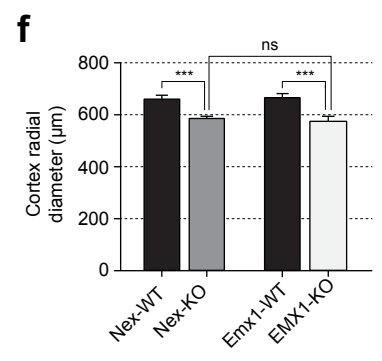

|  |                                                                |
|--|----------------------------------------------------------------|
|  | <i>Bicd2<sup>fl/fl</sup>; Nex-Cre<sup>-/-</sup></i> = Nex-WT   |
|  | <i>Bicd2<sup>fl/fl</sup>; Nex-Cre<sup>+/-</sup></i> = Nex-KO   |
|  | <i>Bicd2<sup>fl/fl</sup>; Emx1-Cre<sup>-/-</sup></i> = Emx1-WT |
|  | <i>Bicd2<sup>fl/fl</sup>; Emx1-Cre<sup>+/-</sup></i> = Emx1-KO |
