# Supplementary material for: Dynein activating adaptor BICD2 controls radial migration of upper-layer cortical neurons in vivo
Source: Springer Nature journal article supplement (doi:10.1186/s40478-019-0827-y), 2019-10-26

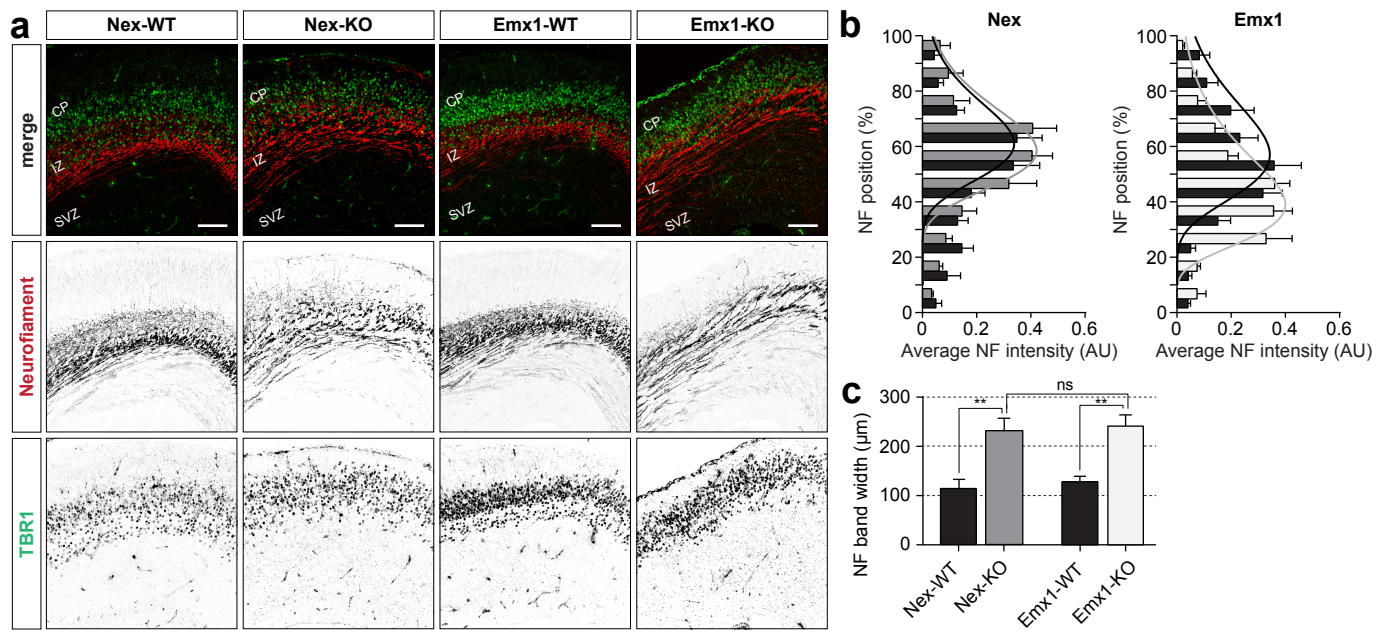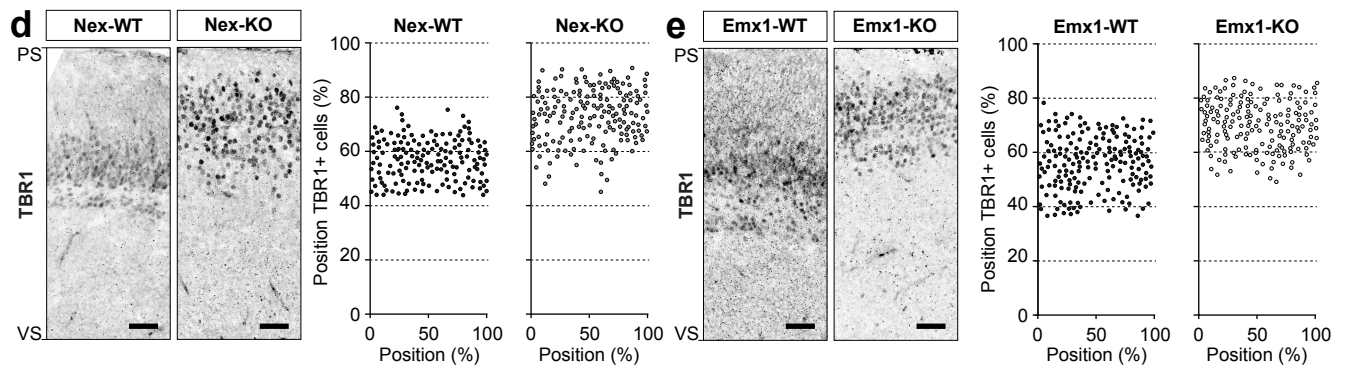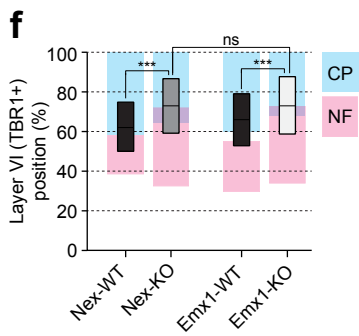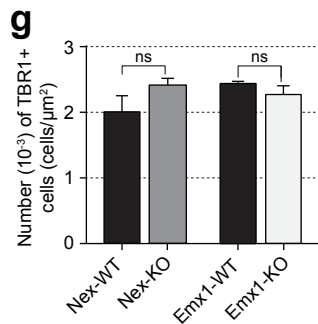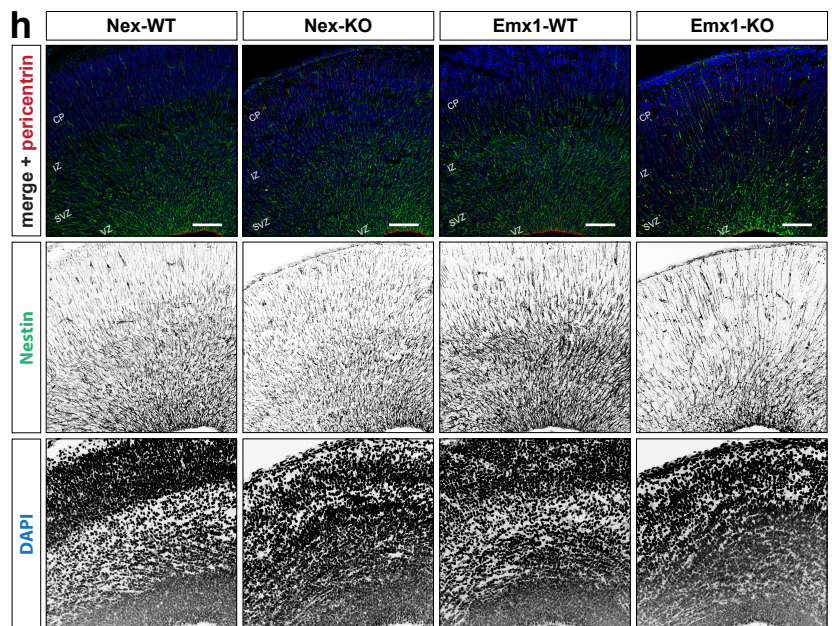

Supplement: MOESM2 [file 25666974]
